# Supplementary material
Source: HighWire-hosted journal article supplement (https://bmjopen.bmj.com/content/12/3/e058368)
Supplement: inline-supplementary-material-1 [file inline-supplementary-material-1.pdf]

## Supplementary

### Appendix 1 – Search terms

**Table 1: Search strategy and search terms used for MEDLINE**

|           | <b>Search term</b>                      | <b>Field</b> |
|-----------|-----------------------------------------|--------------|
| <b>1</b>  | “Renal Dialysis”                        | TI, AB       |
| <b>2</b>  | Haemodialysis                           | TI, AB       |
| <b>3</b>  | Hemodialysis                            | TI, AB       |
| <b>4</b>  | Dialysis                                | TI, AB       |
| <b>5</b>  | Trial                                   | TI, AB       |
| <b>6</b>  | “Randomized controlled trial”           | TI, AB       |
| <b>7</b>  | “Randomised controlled trial”           | TI, AB       |
| <b>8</b>  | (Parallel adj5 trial)                   | TI, AB       |
| <b>9</b>  | (Parallel-group adj5 trial)             | TI, AB       |
| <b>10</b> | (Crossover adj5 trial)                  | TI, AB       |
| <b>11</b> | (Cross-over adj5 trial)                 | TI, AB       |
| <b>12</b> | (Cluster adj5 trial)                    | TI, AB       |
| <b>13</b> | (Stepped wedge adj5 trial)              | TI, AB       |
| <b>14</b> | (Stepped-wedge adj5 trial)              | TI, AB       |
| <b>15</b> | 1OR2OR3OR4                              |              |
| <b>16</b> | 5OR6OR7OR8OR9OR10OR11OR12OR<br>13 OR 14 |              |
| <b>17</b> | 15 AND 16                               |              |
| <b>18</b> | Limit 17 to yr=“2013-2019”              |              |
|           |                                         |              |

TI, title; AB,abstract

## Appendix 2 – Data Extraction Forms

**Table 1: Table representing data items extracted for parallel-group studies, with notes to reviewer for data extraction**

| <b>Data to be extracted</b>                                      | <b>Notes to reviewer</b>                                                                               |
|------------------------------------------------------------------|--------------------------------------------------------------------------------------------------------|
| <b>Study ID</b>                                                  |                                                                                                        |
| <b>Title</b>                                                     |                                                                                                        |
| <b>Author</b>                                                    |                                                                                                        |
| <b>Year Published</b>                                            |                                                                                                        |
| <b>Country</b>                                                   |                                                                                                        |
| <b>Intervention type</b>                                         | Pharmacological, device, procedure, lifestyle or other                                                 |
| <b>Type of trial</b>                                             | Pilot/Feasibility/Full trial                                                                           |
| <b>States how sample size was determined?</b>                    | Yes/No                                                                                                 |
| <b>Number of participants recruited</b>                          | Defined as number who consented                                                                        |
| <b>Number of participants that finished trial</b>                |                                                                                                        |
| <b>Achieved target recruitment?</b>                              | Yes/No (note what target recruitment was)                                                              |
| <b>Patient retention</b>                                         | Percentage: number of participants who finished trial/number of participants recruited                 |
| <b>Patient attrition</b>                                         | Percentage: number of participants who were lost to follow up/number of participants recruited         |
| <b>Lost to follow up due to withdrawal of consent</b>            | Number of participants that chose to withdraw their consent                                            |
| <b>Percentage lost to follow up due to withdrawal of consent</b> | Number of participants that chose to withdraw consent/total number of participants that left the trial |
| <b>Use of CONSORT or flow diagram</b>                            | Yes/No                                                                                                 |
| <b>Achieved statistically significant primary outcome</b>        | Yes/No                                                                                                 |
| <b>Length of trial</b>                                           | In months. State whether data is for length of trial or length of intervention                         |

**Table 2: Table representing data items extracted for crossover studies, with notes to reviewer for data extraction**

| <b>Data to be extracted</b>                                      | <b>Notes to reviewer</b>                                                                               |
|------------------------------------------------------------------|--------------------------------------------------------------------------------------------------------|
| <b>Study ID</b>                                                  |                                                                                                        |
| <b>Title</b>                                                     |                                                                                                        |
| <b>Author</b>                                                    |                                                                                                        |
| <b>Year Published</b>                                            |                                                                                                        |
| <b>Country</b>                                                   |                                                                                                        |
| <b>Intervention type</b>                                         | Pharmacological, device, procedure, lifestyle or other                                                 |
| <b>Type of trial</b>                                             | Pilot/Feasibility/Full trial                                                                           |
| <b>States how sample size was determined?</b>                    | Yes/No                                                                                                 |
| <b>Was within participant variability accounted for?</b>         | Yes/No                                                                                                 |
| <b>Number of participants recruited</b>                          | Defined as number who consented                                                                        |
| <b>Number of participants that finished trial</b>                |                                                                                                        |
| <b>Achieved target recruitment?</b>                              | Yes/No (note what target recruitment was)                                                              |
| <b>Patient retention</b>                                         | Percentage: number of participants who finished trial/number of participants recruited                 |
| <b>Patient attrition</b>                                         | Percentage: number of participants who were lost to follow up/number of participants recruited         |
| <b>Lost to follow up due to withdrawal of consent</b>            | Number of participants that chose to withdraw their consent                                            |
| <b>Percentage lost to follow up due to withdrawal of consent</b> | Number of participants that chose to withdraw consent/total number of participants that left the trial |
| <b>Use of CONSORT or flow diagram</b>                            | Yes/No                                                                                                 |
| <b>Achieved statistically significant primary outcome</b>        | Yes/No                                                                                                 |
| <b>Length of trial</b>                                           | In months. State whether data is for length of trial or length of intervention                         |

**Table 3: Table representing data items extracted for cluster studies, with notes to reviewer for data extraction**

| <b>Data to be extracted</b>                                           | <b>Notes to reviewer</b>                                                                       |
|-----------------------------------------------------------------------|------------------------------------------------------------------------------------------------|
| <b>Study ID</b>                                                       |                                                                                                |
| <b>Title</b>                                                          |                                                                                                |
| <b>Author</b>                                                         |                                                                                                |
| <b>Year Published</b>                                                 |                                                                                                |
| <b>Country</b>                                                        |                                                                                                |
| <b>Intervention type</b>                                              | Pharmacological, device, procedure, lifestyle or other                                         |
| <b>Type of trial</b>                                                  | Pilot/Feasibility/Full trial                                                                   |
| <b>Is there sample size justification?</b>                            | Yes/No                                                                                         |
| <b>Does it provide number of clusters in sample size calculation?</b> | Yes/No                                                                                         |
| <b>Does it provide cluster size?</b>                                  | Yes/No                                                                                         |
| <b>Does it state if equal or unequal cluster sizes are assumed?</b>   | Yes/No                                                                                         |
| <b>Does it state the ICC?</b>                                         | Yes/No                                                                                         |
| <b>Does it state uncertainty in ICC?</b>                              | Yes/No                                                                                         |
| <b>How was the cluster formed?</b>                                    | Dialysis shift/HD centre                                                                       |
| <b>Number of participants recruited</b>                               | Defined as number who consented                                                                |
| <b>Number of participants that finished trial</b>                     |                                                                                                |
| <b>Achieved target recruitment?</b>                                   | Yes/No (note what target recruitment was)                                                      |
| <b>Patient retention</b>                                              | Percentage: number of participants who finished trial/number of participants recruited         |
| <b>Patient attrition</b>                                              | Percentage: number of participants who were lost to follow up/number of participants recruited |

|                                                                  |                                                                                                        |
|------------------------------------------------------------------|--------------------------------------------------------------------------------------------------------|
| <b>Lost to follow up due to withdrawal of consent</b>            | Number of participants that chose to withdraw their consent                                            |
| <b>Percentage lost to follow up due to withdrawal of consent</b> | Number of participants that chose to withdraw consent/total number of participants that left the trial |
| <b>Use of CONSORT or flow diagram</b>                            | Yes/No                                                                                                 |
| <b>Achieved statistically significant primary outcome</b>        | Yes/No                                                                                                 |
| <b>Length of trial</b>                                           | In months. State whether data is for length of trial or length of intervention                         |

## Appendix 3 - Interview Topic Guide

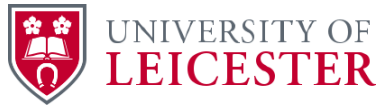

### Patient Interview Topic Guide

#### Introduction

"Firstly, we would like to welcome you to the interview and thank you for agreeing to speak to us. The reason we have asked you to take part in this discussion is that we would like to understand more about different types of research in haemodialysis patients, and how they feel towards different types of research design. This is important because very little is currently known about patients' views on this subject. We will not be asking you for your personal experiences here, unless you want to offer them, but just your opinions as a patient. If you would like further information, please ask at the end.

Before we begin we would like to remind you that whatever you say here will be anonymous.

Your name and personal details will not be mentioned in any report.

We are using a digital recorder to record our conversation because it is difficult for us to write down everything you say. However, no personal identifiable data will be recorded and a participant number will be allocated to you. This will also enable us to give you our full attention and listen to what you have to say."

#### Any questions before we start?

1. Introductions (us and participants, name, and for patients, how long have you been a kidney patient, have you ever taken part in a clinical trial as a haemodialysis (or other) patient)

#### General Views on Research

2. Firstly, we would like to talk to you very generally about Research. To start us off, what comes to mind when you think of the word 'Research'?
3. What do you think are the benefits of research?
  - a. For the participant
  - b. For the wider public
4. What do you think are the disadvantages of research?

#### Introduce trial designs

Historically, studies involving participants with kidney disease have often failed to recruit enough patients and there is a high rate of participants leaving the study before it is over. There may be many reasons for this. However, it affects the strength of the study and how much information we can learn from it. Trials in this population are usually parallel group RCTs (will explain later). One proposal is that by changing the design of the trial, it may be

possible to improve recruitment and retention, so we wanted to discuss some alternative, novel trial designs and to get your views on them.

**Run through the different trial designs on PowerPoint/paper copies.** Explain parallel group is the traditional one and the ones that follow are newer designs and fewer studies in kidney patients have used them yet.

For **each** trial design

5. What do you think of this design?
6. What would make you want to join a study with this design?
7. What would put you off joining a study with design?
8. If you agreed to take part in a study of this design, what might make you leave the study early? What might encourage you to complete the study?
9. What do you think of the way participants are allocated to arms in this study design?
  - a. How would this affect your decision to join a study, or to stay in the study?

**After going through all trial designs:**

10. As you can see in some study designs, as a participant you would receive the new treatment at some point, whereas in other studies, if you were allocated to the control, you wouldn't receive the new intervention during the study.
  - a. How would this make you feel?
  - b. How important is it to you that you get the treatment on offer?
  - c. How would this impact your participation in the study?
  - d. If you were allocated to an arm where you did not get the treatment/intervention on offer at all, how would you feel about this?
  - e. How would it affect your motivation to stay in the study?
  - f. How would you feel about being in a trial where you spent time having the treatment but also the control?
11. Would you prefer to be in a trial that ensured you had the treatment on offer even if it were a longer trial?
12. We know that some studies in HD patients managed to recruit the correct amount of people they needed for the study and other study designs were less able to do this. Does this surprise you? Why do you think this might be?
13. We also found that some studies had more people dropping out of studies compared to others, does this surprise you? Why do you think this might be?
14. How would the length of a trial affect your decision to join a study? What do you consider is 'too long' for a study follow up? What do you think is the ideal length of time to be in a study?
  - a. How could the burden of follow up be reduced?

- b. Would the amount of follow up factor into your decision on whether to join or continue with the study?
15. Are there any potential other factors to do with your health or management that might impact on you volunteering to take part in a trial?  
(if necessary to prompt)- some people have mentioned about being on the transplant list or perhaps concerned about switching dialysis times, how would you feel about that?
16. Anything else you would like to say/or any questions?
17. Is there anything you feel we have missed out or thought we would cover that you would like to discuss?

**End**

**Closing and thanks** - check that the participant is still happy for you to use all the information provided and offer the possibility to erase sections of the recording. **Reiterate anonymity etc.**

Thank them for their time and contribution.

**Contact details and what next.**



## Appendix 4 – Visual Aids for Interviews

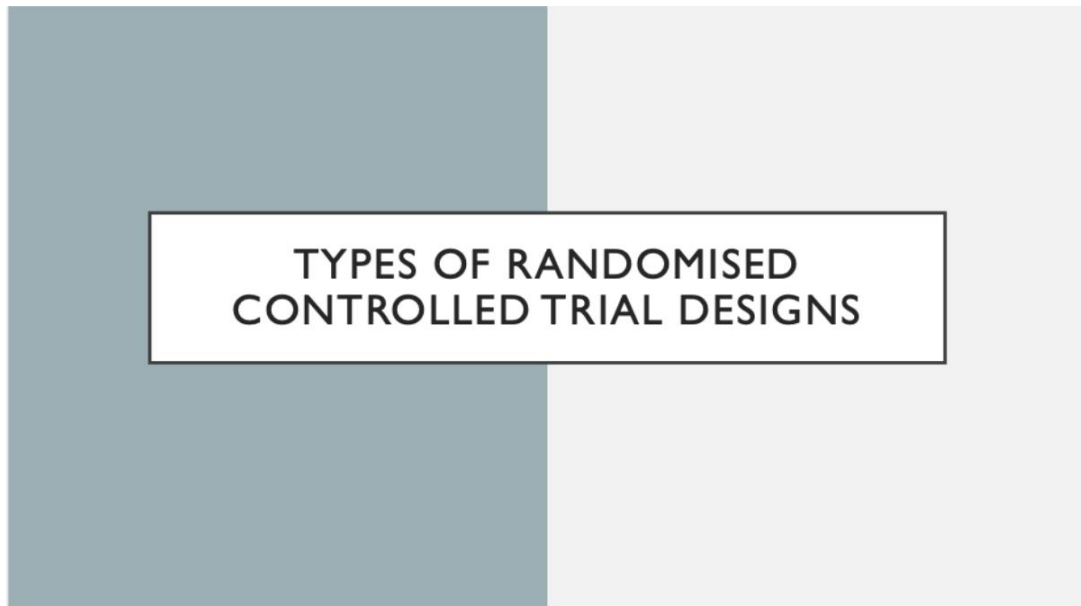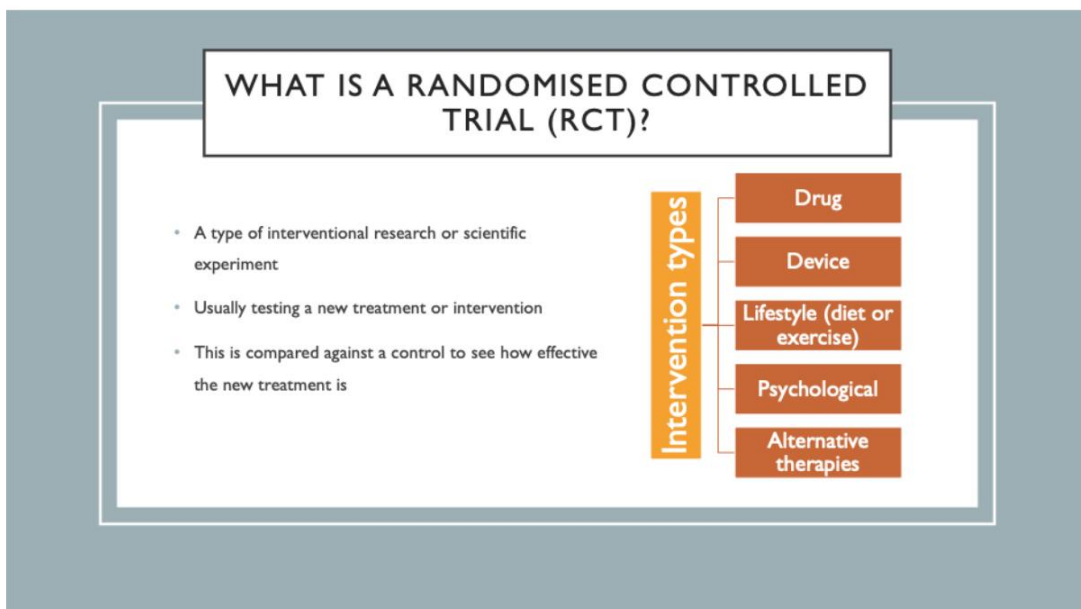

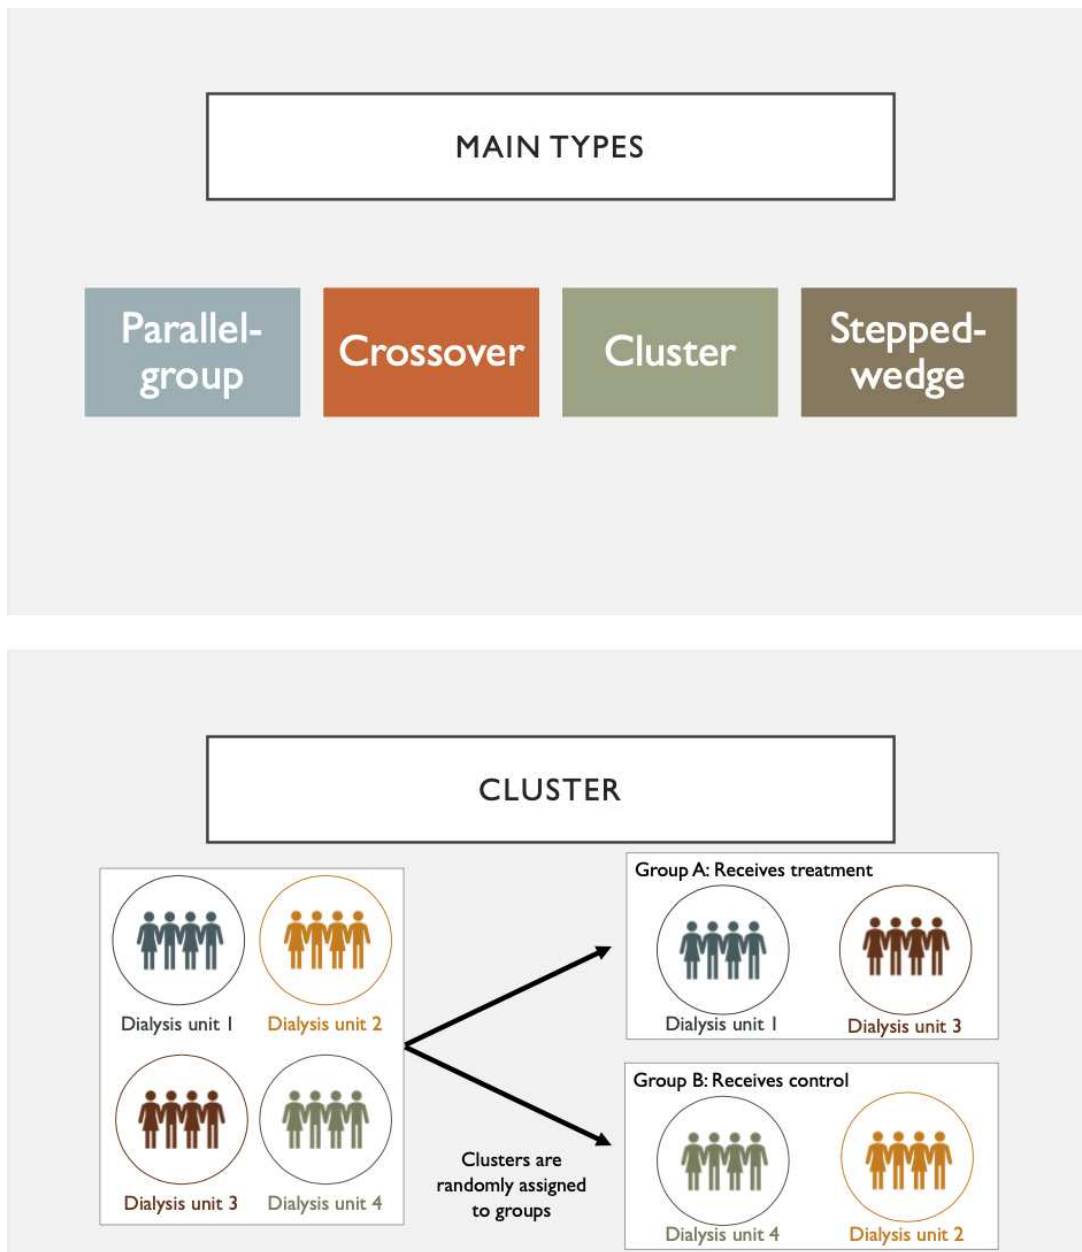

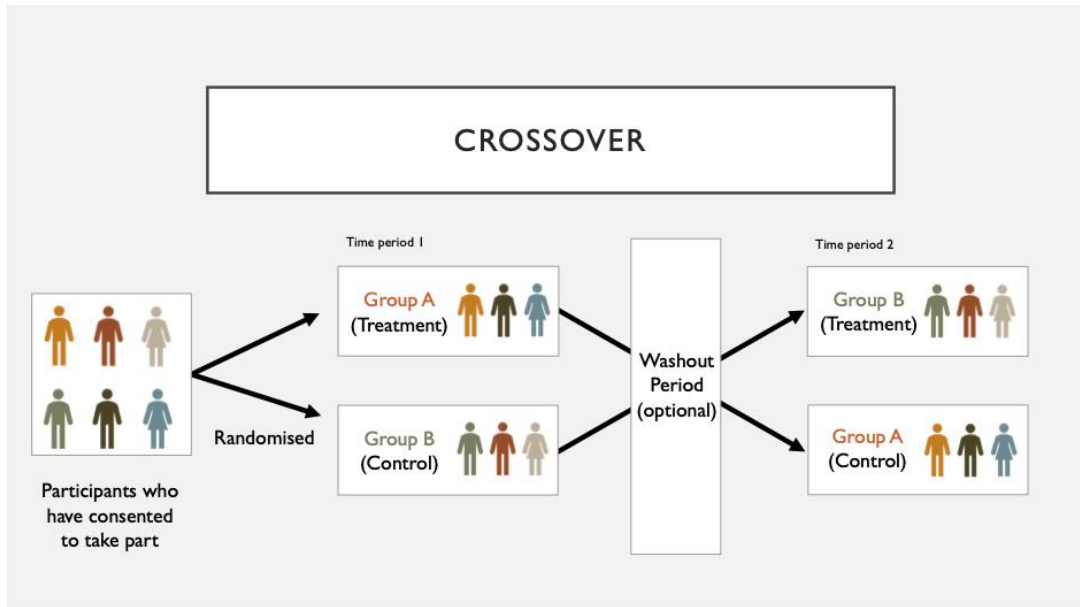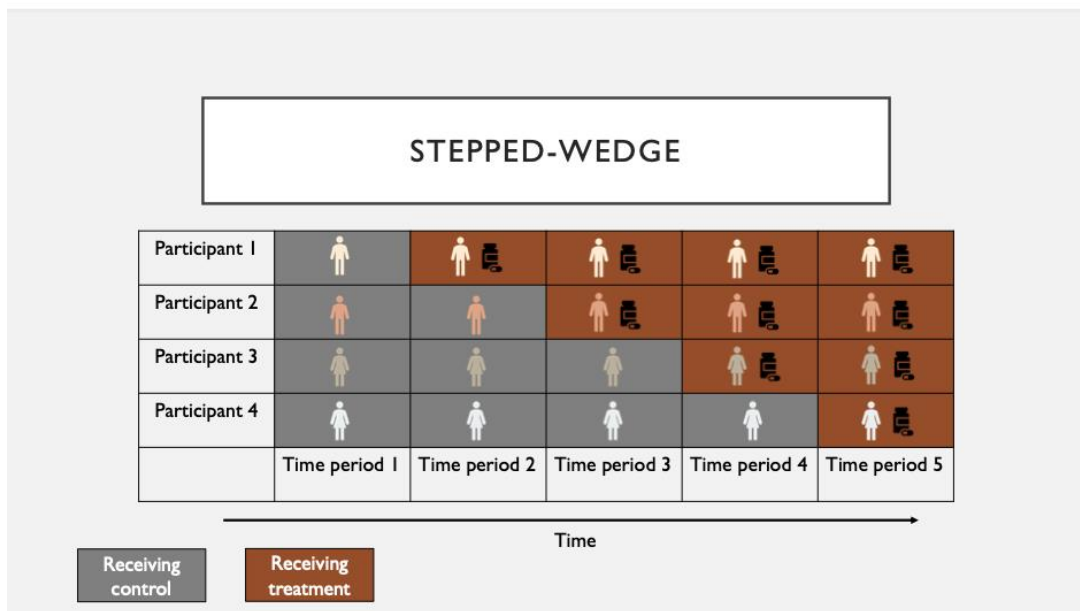

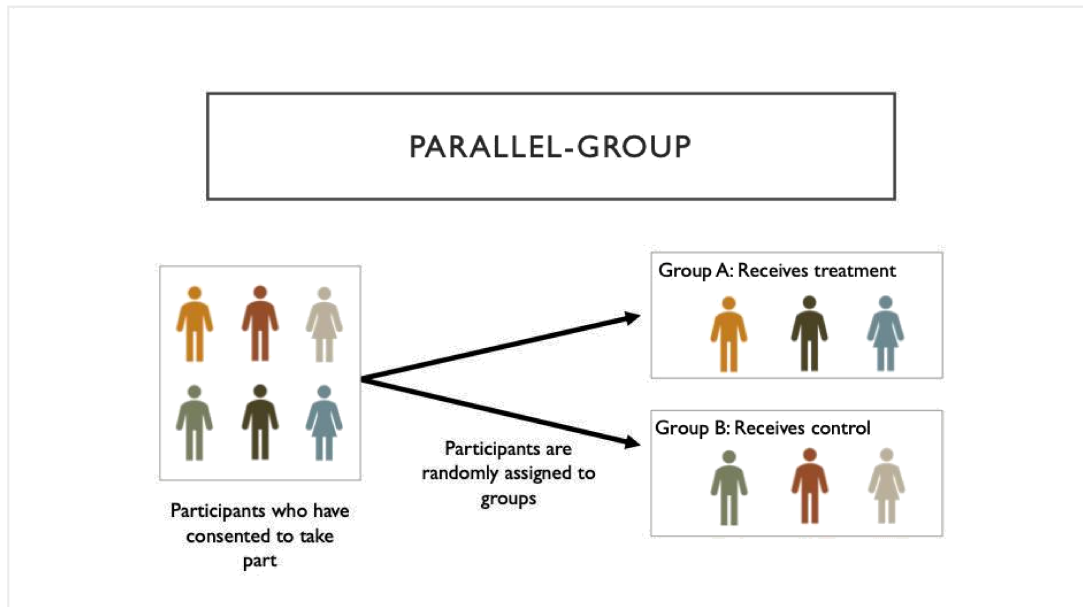

## Appendix 5 – Included studies

### Table 1: Individually randomised parallel-group trials selected for review

| Author                          | Year | Country             | Intervention type | Study groups                                | LoS in mths | Justification of SS | No. of ppts at start | No. of ppts at end | Achieved target recruitment | Retention rate(%) | % of ppts lost due to WOC | Use of flow diagram | Achieved stat. sig. endpoint |
|---------------------------------|------|---------------------|-------------------|---------------------------------------------|-------------|---------------------|----------------------|--------------------|-----------------------------|-------------------|---------------------------|---------------------|------------------------------|
| <b>Akrami et al (6)</b>         | 2016 | Iran                | Lifestyle         | 1: FP<br>2: Placebo                         | 4           | No                  | 79                   | 63                 | NR                          | 79.8              | 87.5                      | Yes                 | Yes                          |
| <b>Bacci et al (7)</b>          | 2018 | Brazil              | Procedure         | 1: RICP<br>2: Ctrl                          | NR          | No                  | 47                   | NR                 | Yes                         | NR                | NR                        | No                  | No                           |
| <b>Bansal et al (8)</b>         | 2014 | India               | Pharm             | 1: Cholecalciferol<br>2: Ctrl               | 5           | Yes                 | 45                   | 27                 | Yes                         | 60                | 0                         | Yes                 | No                           |
| <b>Gaweda et al (9)</b>         | 2014 | USA                 | Pharm             | 1: Ctrl<br>2: SAM                           | 17          | Yes                 | 62                   | 52                 | Yes                         | 83.9              | 10                        | Yes                 | Yes                          |
| <b>Gobo-Oliveira et al (10)</b> | 2018 | Brazil              | Pharm             | 1: Gabapentin<br>2: DEX                     | 17          | Yes                 | 60                   | 58                 | Yes                         | 96.7              | 0                         | Yes                 | No                           |
| <b>Hassanzadeh et al (11)</b>   | 2018 | Iran                | Other (Alt.)      | 1: Relaxation<br>2: Aromatherapy<br>3: Ctrl | 10          | Yes                 | 105                  | NR                 | Yes                         | NR                | NR                        | No                  | Yes                          |
| <b>Huan-Sheng et al (12)</b>    | 2016 | Taiwan              | Device            | 1: BCM-BIS<br>2: SC                         | 12          | Yes                 | 298                  | 251                | No                          | 84.2              | 27.7                      | Yes                 | No                           |
| <b>Khosroshahi et al (5)</b>    | 2013 | Iran                | Lifestyle         | 1: Omega-3<br>2: Placebo                    | NR          | Yes                 | 100                  | 88                 | Yes                         | 88                | 0                         | No                  | Yes                          |
| <b>Lenglet et al (13)</b>       | 2017 | France              | Pharm             | 1: Nicotinamide<br>2: Sevelamer             | 60          | Yes                 | 100                  | 73                 | No                          | 73                | NR                        | Yes                 | No                           |
| <b>Loutradis et al (14)</b>     | 2019 | Slovenia and Greece | Procedure         | 1: Lung US<br>2: Ctrl                       | NR          | Yes                 | 71                   | 67                 | Yes                         | 94.4              | 0                         | Yes                 | Yes                          |

|                                    |      |         |              |                                                 |    |     |     |     |     |      |      |     |     |
|------------------------------------|------|---------|--------------|-------------------------------------------------|----|-----|-----|-----|-----|------|------|-----|-----|
| <b>Makhlough et al (15)</b>        | 2016 | Iran    | Pharm        | 1: Hybrid therapy<br>2: Standard triple therapy | NR | No  | 40  | 40  | NR  | 100  | 0    | Yes | Yes |
| <b>Martins do Valle et al (16)</b> | 2019 | Brazil  | Lifestyle    | 1: ID Ex<br>2: Ctrl                             | NR | No  | 24  | 19  | NR  | 79.2 | 0    | Yes | No  |
| <b>Momennasab et al (17)</b>       | 2018 | Iran    | Other (Alt.) | 1: ID Music<br>2: Music at night<br>3: Ctrl     | 8  | Yes | 105 | 102 | Yes | 97.1 | 33.3 | Yes | Yes |
| <b>Morena et al (18)</b>           | 2017 | France  | Device       | 1: HFHD<br>2: OLHDF                             | 84 | Yes | 381 | 261 | Yes | 68.5 | NR   | Yes | Yes |
| <b>Nahidi et al (19)</b>           | 2018 | Iran    | Other (Alt.) | 1: Acupuncture<br>2: Sham                       | 24 | Yes | 30  | 26  | Yes | 86.7 | 100  | Yes | Yes |
| <b>Obi et al (20)</b>              | 2016 | Japan   | Lifestyle    | 1: Vitamin B6<br>2: Ctrl                        | NR | Yes | 60  | 44  | NR  | 73.3 | 0    | Yes | Yes |
| <b>Rad et al (21)</b>              | 2017 | Iran    | Procedure    | 1: Cool dialysate<br>2: Ctrl                    | 4  | Yes | 60  | 60  | Yes | 100  | 0    | Yes | Yes |
| <b>Rhee et al (22)</b>             | 2017 | USA     | Lifestyle    | 1: High protein<br>2: Low protein               | NR | Yes | 110 | 106 | Yes | 96.4 | NR   | Yes | Yes |
| <b>Ronco et al (23)</b>            | 2017 | Italy   | Device       | 1: NV dialyzer<br>2: Standard                   | NR | Yes | 19  | 17  | No  | 89.5 | 0    | No  | No  |
| <b>Schardong et al (24)</b>        | 2017 | Brazil  | Procedure    | 1: NMES<br>2: Ctrl                              | 9  | Yes | 24  | 21  | Yes | 87.5 | 100  | Yes | Yes |
| <b>Schlosser et al (25)</b>        | 2016 | Germany | Procedure    | 1: TPTX + AT<br>2: TPTX                         | 72 | Yes | 100 | 74  | Yes | 74   | 34.6 | Yes | Yes |
| <b>Siriopol et al (26)</b>         | 2017 | Romania | Device       | 1: Lung US<br>2: SC                             | 25 | Yes | 250 | 241 | No  | 96.4 | 0    | Yes | No  |
| <b>Tayebi et al (27)</b>           | 2019 | Iran    | Lifestyle    | 1: Ctrl<br>2: BCAA + Ex<br>3: Ex                | NR | No  | 51  | 48  | NR  | 94.1 | NR   | Yes | Yes |
| <b>Thadhani et al (28)</b>         | 2017 | USA     | Lifestyle    | 1: Oral Vitamin D<br>2: Placebo                 | 5  | Yes | 62  | 53  | Yes | 85.5 | 22.2 | Yes | Yes |

|                          |      |        |        |                              |    |    |    |    |    |      |      |     |     |
|--------------------------|------|--------|--------|------------------------------|----|----|----|----|----|------|------|-----|-----|
| <b>Xavier et al (29)</b> | 2015 | Brazil | Device | 1: CPAP<br>2: Ctrl           | NR | No | 40 | 37 | NR | 92.5 | 66.7 | Yes | Yes |
| <b>Ziaee et al (30)</b>  | 2019 | Iran   | Pharm  | 1: Spironolactone<br>2: Ctrl | NR | No | 48 | 43 | NR | 89.6 | 0    | No  | Yes |

Alt., alternative therapies; BCAA, branched chain amino acids; BCM-BIS, bioimpedance spectroscopy; CPAP, continuous positive airway pressure; Ctrl, control; DEX, dexchlorpheniramine; Ex, exercise; FP, fumaria parviflora L; HFHD, high-flux haemodialysis; ID, intradialytic; Lol, length of intervention; LoS, length of study; Mnths, months; NMES, neuromuscular electrical stimulation; No., number; NR, not reported; OLHDF, online hemodiafiltration; Pharm, pharmacological; Ppt(s), participant(s); RICP, remote ischaemic preconditioning; SAM, smart anaemia manager; SC, standard care; SS, sample size; SSC, sample size calculation; Stat. sig., statistically significant; TPTX + AT, total parathyroidectomy with autotransplantation; TPTX, total parathyroidectomy; UC, unclear; US, ultrasound; WoC, withdrawal of consent



Table 2: Crossover trials selected for review

| Author                 | Year | Country         | Intervention type | Study groups                                                                | LoS in mths | Justification of SS | Within pharmaceutical counter | No. of ppts at start | No. of ppts at end | Achieved target recruitment | Retention rate (%) | % of ppts lost due to WOC | Use of flow diagram | Achieved stat. sig. endpoint |
|------------------------|------|-----------------|-------------------|-----------------------------------------------------------------------------|-------------|---------------------|-------------------------------|----------------------|--------------------|-----------------------------|--------------------|---------------------------|---------------------|------------------------------|
| De Sequera et al (31)  | 2019 | Spain           | Pharm             | 1: CDF<br>2: ADF                                                            | 8           | No                  | No                            | 56                   | 46                 | NR                          | 82.1               | UC                        | Yes                 | No                           |
| Eljaoudi et al (32)    | 2015 | Morocco         | Other (Alt.)      | 1: Argan oil<br>2: Ctrl                                                     | NR          | Yes                 | No                            | 37                   | NR                 | Yes                         | NR                 | NR                        | No                  | Yes                          |
| Ettema et al (33)      | 2018 | The Netherlands | Procedure         | 1: Standard HD<br>2: HD with BF                                             | 6           | Yes                 | No                            | 30                   | 29                 | Yes                         | 96.7               | 0                         | Yes                 | Yes                          |
| Jeong et al (34)       | 2018 | USA             | Lifestyle         | 1: Ctrl<br>2: ID Ex in 1 <sup>st</sup> hr<br>3: ID Ex in 3 <sup>rd</sup> hr | UC          | No                  | No                            | 12                   | 8                  | NR                          | 66.7               | 75                        | No                  | NR                           |
| Leung et al (35)       | 2017 | Canada          | Device            | 1: Ctrl<br>2: HD with BF                                                    | 12          | Yes                 | No                            | 35                   | 26                 | Yes                         | 74.3               | 0                         | Yes                 | No                           |
| Orcy et al (36)        | 2014 | Brazil          | Lifestyle         | 1: Ctrl<br>2: ID Ex                                                         | 9           | No                  | No                            | 24                   | 22                 | NR                          | 91.7               | 0                         | Yes                 | No                           |
| Razeghi et al (37)     | 2015 | Iran            | Pharm             | 1: Sertraline<br>2: Placebo                                                 | 20          | No                  | No                            | NR                   | 12                 | NR                          | NR                 | UC                        | No                  | Yes                          |
| Rivara et al (38)      | 2015 | USA             | Lifestyle         | 1: Pom juice<br>2: Pom extract                                              | 8           | No                  | No                            | 35                   | 20                 | NR                          | 57.1               | 46.7                      | Yes                 | Yes                          |
| Shahgholian et al (39) | 2014 | Iran            | Device            | 1: Standard HD<br>2: SSUF<br>3: SDFR                                        | NR          | No                  | No                            | NR                   | 32                 | NR                          | NR                 | NR                        | No                  | No                           |
| Smith et al (40)       | 2017 | USA             | Pharm             | 1: 4 mEq/L Ac<br>2: 8 mEq/L Ac                                              | UC          | Yes                 | No                            | 11                   | 10                 | Yes                         | 90.9               | 100                       | Yes                 | Yes                          |

|                            |      |        |           |                                    |    |     |     |    |    |     |      |      |     |    |
|----------------------------|------|--------|-----------|------------------------------------|----|-----|-----|----|----|-----|------|------|-----|----|
| <b>Thompson et al (41)</b> | 2016 | Canada | Device    | 1: Two high flux<br>2: Standard HD | UC | Yes | No  | 33 | 31 | Yes | 93.1 | 0    | Yes | No |
| <b>Tsai et al (42)</b>     | 2019 | Taiwan | Lifestyle | 1: VLP diet<br>2: LP diet          | 6  | Yes | No  | 35 | 29 | Yes | 82.9 | 83.3 | Yes | No |
| <b>Wu et al (43)</b>       | 2013 | Taiwan | Procedure | 1: SLED<br>2: CVVH                 | NR | Yes | Yes | 12 | 10 | Yes | 83.3 | 0    | Yes | No |

Ac, acetate; ADF, dialysis fluid containing acetate; Alt., alternative therapies; BF, biofeedback; CDF, dialysis fluid containing citrate; Ctrl, control; CVVH, continuous veno-venous haemofiltration; Ex, exercise; HD, haemodialysis; ID, intradialytic; Lol, length of intervention; LoS, length of study; LP, low phosphate; Mnths, months; No., number; NR, not reported; Pharm, pharmacological; Pom, pomegranate; Ppt(s), participant(s); SC, standard care; SDFR, stepwise dialysis solution flow rate profiles; SLED, sustained low-efficiency dialysis; SS, sample size; SSC, sample size calculation; SSUF, stepwise sodium and ultrafiltration profiles; Stat. sig., statistically significant; UC, unclear; VLP, very low phosphate; WoC, withdrawal of consent

Table 3: Cluster trials for review

| Author                | Year | Country   | Intervention Type | Study groups                   | LoS (LoI) in mths | SS requirements from CONSORT statement |                               |           |                                        |            |                           | Cluster formation | No. of ppts at start | No. of ppts at end | Achieved target recruitment | Retention rate (%) | % of ppts lost due to WoC | Use of flow diagram | Achieved stat. sig. endpoint |
|-----------------------|------|-----------|-------------------|--------------------------------|-------------------|----------------------------------------|-------------------------------|-----------|----------------------------------------|------------|---------------------------|-------------------|----------------------|--------------------|-----------------------------|--------------------|---------------------------|---------------------|------------------------------|
|                       |      |           |                   |                                |                   | Justification of SS                    | Stated no. of clusters in SSC | Stated CS | Stated if equal or unequal ICC assumed | Stated ICC | Stated uncertainty in ICC |                   |                      |                    |                             |                    |                           |                     |                              |
| Bennett et al (45)    | 2013 | Australia | LS                | 1: NS<br>2: SC                 | UC                | No                                     | No                            | No        | No                                     | No         | No                        | HDC               | 96                   | 81                 | Yes                         | 84.4               | 0                         | No                  | Yes                          |
| Bennett et al (44)    | 2015 | Australia | LS<br>S/W         | 3 groups<br>ID Ex              | UC<br>(36)        | Yes                                    | Yes                           | Yes       | No                                     | Yes        | No                        | HDC               | 228                  | 113                | Yes                         | 49.6               | 27.8                      | Yes                 | Yes                          |
| Birdee et al (46)     | 2015 | USA       | LS                | 1: ID Yoga<br>2: E/P           | UC                | No                                     | No                            | No        | No                                     | No         | No                        | D/S               | 31                   | 26                 | Yes                         | 83.9               | 40                        | Yes                 | Yes                          |
| Griva et al (47)      | 2018 | Singapore | Other<br>(PBE)    | 1: S/M<br>2: SC                | 39                | No                                     | No                            | No        | No                                     | No         | No                        | D/S               | 259                  | 195                | NR                          | 82.1               | 57.8                      | Yes                 | Yes                          |
| Griva et al (48)      | 2019 | Singapore | Other<br>(PBE)    | 1: SC<br>2: S/M                | NR                | No                                     | No                            | No        | No                                     | No         | No                        | D/S               | 44                   | 42                 | No                          | 95.5               | 0                         | Yes                 | Yes                          |
| Huang et al (49)      | 2018 | China     | Other<br>(PBE)    | 1: S/M<br>2: SC                | UC                | No                                     | No                            | No        | No                                     | No         | No                        | D/S               | 90                   | 83                 | Yes                         | 92.2               | 28.6                      | Yes                 | Yes                          |
| Karavetian et al (50) | 2013 | Lebanon   | Other<br>(PBE)    | 1: SMDC<br>2: EG<br>3: Ctrl    | NR<br>(2)         | No                                     | No                            | No        | No                                     | No         | No                        | D/S               | 122                  | 87                 | NR                          | 72                 | 11.4                      | No                  | Yes                          |
| Karavetian et al (51) | 2015 | Lebanon   | Other<br>(PBE)    | 1: Full<br>2: SC<br>3: Partial | 12                | Yes                                    | No                            | Yes       | No                                     | No         | No                        | D/S               | 570                  | 394                | No                          | 69.1               | 18.2                      | Yes                 | Yes                          |
| Weisbord et al (52)   | 2013 | USA       | Other             | 1: F/B<br>2: NM                | 28<br>(12)        | Yes                                    | No                            | No        | No                                     | No         | No                        | D/S               | 315                  | 186                | NR                          | 59                 | 27.1                      | Yes                 | No                           |

|                           |      |    |             |                   |    |     |    |    |    |    |    |     |     |    |     |      |      |     |     |
|---------------------------|------|----|-------------|-------------------|----|-----|----|----|----|----|----|-----|-----|----|-----|------|------|-----|-----|
| <b>Wileman et al (53)</b> | 2016 | UK | Other (PBE) | 1: S/A<br>2: Ctrl | UC | Yes | No | No | No | No | No | D/S | 91  | 60 | Yes | 65.9 | UC   | Yes | Yes |
| <b>Wileman et al (54)</b> | 2014 | UK | Other (PBE) | 1: S/A<br>2: Ctrl | UC | Yes | No | No | No | No | No | D/S | 119 | 90 | Yes | 75.6 | 17.2 | Yes | No  |

Alt., alternative therapies; CS, cluster size; Ctrl, control; D/S, dialysis shift; E/G, educational games; E/P, educational program; Ex, exercise; F/B, feedback arm; HDC, haemodialysis centre; ICC, intracluster correlation coefficient; ID, intradialytic; IoI, length of intervention; LoS, length of study; LS, lifestyle; Mngt, management; Mths, months; NM, nurse management; No., number; NR, Not reported; NS, nutrition screening; PBE, Psychological, behavioural and educational; Pharm, pharmacological; Ppt(s), participant(s); S/A, self-affirmation; S/M, self-management; S/W, stepped-wedge; SC, standard care; SMDC, self-management dietary counselling; SS, sample size; SSC, sample size calculation; Stat.sig., statistically significant; UC, unclear; WoC, withdrawal of consent

## References

1. Sterne JAC, Savović J, Page MJ, Elbers RG, Blencowe NS, Boutron I, et al. RoB 2: a revised tool for assessing risk of bias in randomised trials. *BMJ (Clinical research ed)*. 2019;366:l4898.
2. Sterne JAC, Savović J, Page MJ, et al. RoB 2 tool.
3. Bhargava R, Kalra PA, Hann M, Brenchley P, Hurst H, Hutchison AJ. A randomized controlled trial of different serum phosphate ranges in subjects on hemodialysis. *BMC nephrology*. 2019;20(1):37.
4. Macdougall IC, White C, Anker SD, Bhandari S, Farrington K, Kalra PA, et al. Intravenous Iron in Patients Undergoing Maintenance Hemodialysis. *The New England Journal of Medicine*. 2019;380(5):447-58.
5. Tayebi-Khosroshahi H, Dehgan R, Habibi Asl B, Safaian A, Panahi F, Estakhri R, et al. Effect of omega-3 supplementation on serum level of homocysteine in hemodialysis patients. *Iran J Kidney Dis*. 2013;7(6):479-84.
6. Akrami R, Hashempur M, Tavakoli A, Nimrouzi M, Sayadi M, Roodaki M, et al. Effects of *Fumaria parviflora* L on Uremic Pruritus in Hemodialysis Patients: A Randomized, Double-Blind, Placebo-Controlled Trial. *Jundishapur Journal of Natural Pharmaceutical Products*. 2016;inpress.
7. Bacci MR, Vasconcelos LY, Murad N, Chagas ACP, Capuano AC, Alves BC, et al. Remote ischemic preconditioning in myocardial protection in hemodialysis patients. *Int J Gen Med*. 2018;11:175-8.
8. Bansal B, Bansal SB, Mithal A, Kher V, Marwaha R, Singh P, et al. A randomized controlled trial of cholecalciferol supplementation in patients on maintenance hemodialysis. *Indian J Endocrinol Metab*. 2014;18(5):655-61.
9. Gaweda AE, Aronoff GR, Jacobs AA, Rai SN, Brier ME. Individualized anemia management reduces hemoglobin variability in hemodialysis patients. *J Am Soc Nephrol*. 2014;25(1):159-66.
10. Gobo-Oliveira M, Pigari VG, Ogata MS, Miot HA, Ponce D, Abbade LP. Gabapentin versus dexchlorpheniramine as treatment for uremic pruritus: a randomised controlled trial. *European Journal of Dermatology*. 2018;28(4):488-95.
11. Hassanzadeh M, Kiani F, Bouya S, Zarei M. Comparing the effects of relaxation technique and inhalation aromatherapy on fatigue in patients undergoing hemodialysis. *Complement Ther Clin Pract*. 2018;31:210-4.
12. Huan-Sheng C, Yeong-Chang C, Ming-Hsing H, Fan-Lieh T, Chu-Cheng L, Tsai-Kun W, et al. Application of bioimpedance spectroscopy in Asian dialysis patients (ABISAD-III): a randomized controlled trial for clinical outcomes. *Int Urol Nephrol*. 2016;48(11):1897-909.
13. Lenglet A, Liabeuf S, El Esper N, Brisset S, Mansour J, Lemaire-Hurtel AS, et al. Efficacy and safety of nicotinamide in haemodialysis patients: the NICOREN study. *Nephrol Dial Transplant*. 2017;32(5):870-9.
14. Loutradis C, Sarafidis PA, Ekart R, Papadopoulos C, Sachpekidis V, Alexandrou ME, et al. The effect of dry-weight reduction guided by lung ultrasound on ambulatory blood pressure in hemodialysis patients: a randomized controlled trial. *Kidney International*. 2019;95(6):1505-13.

15. Makhloogh A, Fakheri H, Hojati S, Hosseini V, Bari Z. A Comparison between Hybrid Therapy and Standard Triple Therapy for *Helicobacter pylori* Eradication in Patients with Uremia: A Randomized Clinical Trial. *Middle East J Dig Dis.* 2016;8(1):39-43.
16. Martins do Valle F, Valle Pinheiro B, Almeida Barros AA, Ferreira Mendonça W, de Oliveira AC, de Oliveira Werneck G, et al. Effects of intradialytic resistance training on physical activity in daily life, muscle strength, physical capacity and quality of life in hemodialysis patients: a randomized clinical trial. *Disabil Rehabil.* 2019:1-7.
17. Momennasab M, Ranjbar M, Najafi SS. Comparing the effect of listening to music during hemodialysis and at bedtime on sleep quality of hemodialysis patients: A randomized clinical trial. *European Journal of Integrative Medicine.* 2018;17:86-91.
18. Morena M, Jaussent A, Chalabi L, Leray-Moragues H, Chenine L, Debure A, et al. Treatment tolerance and patient-reported outcomes favor online hemodiafiltration compared to high-flux hemodialysis in the elderly. *Kidney International.* 2017;91(6):1495-509.
19. Nahidi Y, Badiie S, Torabi S, Abbasi Shaye Z, Nazemian F, Saki A. Acupuncture Effect on Pruritus in Hemodialysis Patients: A Randomized Clinical Trial. *Iran Red Crescent Med J.* 2018;20(10):e65521.
20. Obi Y, Mikami S, Hamano T, Obi Y, Tanaka H, Shimomura A, et al. Intravenous Vitamin B6 Increases Resistance to Erythropoiesis-Stimulating Agents in Hemodialysis Patients: A Randomized Controlled Trial. *J Ren Nutr.* 2016;26(6):380-90.
21. Rad M, Jaghoury E, Sharifipour F, Rakhshani MH. THE EFFECTS OF COOL DIALYSATE ON PRURITUS STATUS DURING HEMODIALYSIS OF PATIENTS WITH CHRONIC RENAL FAILURE: A CONTROLLED RANDOMIZED CLINICAL TRIAL. *IRANIAN RED CRESCENT MEDICAL JOURNAL (IRCMJ).* 2017;19(1):0-.
22. Rhee CM, You AS, Koontz Parsons T, Tortorici AR, Bross R, St-Jules DE, et al. Effect of high-protein meals during hemodialysis combined with lanthanum carbonate in hypoalbuminemic dialysis patients: findings from the FrEDI randomized controlled trial. *Nephrol Dial Transplant.* 2017;32(7):1233-43.
23. Ronco C, Brendolan A, Nalesso F, Zanella M, De Cal M, Corradi V, et al. Prospective, Randomized, Multicenter, Controlled Trial (TRIATHRON 1) on a New Antithrombogenic Hydrophilic Dialysis Membrane. *Int J Artif Organs.* 2017;40(5):234-9.
24. Schardong J, Dipp T, Bozzeto CB, da Silva MG, Baldissera GL, Ribeiro RC, et al. Effects of Intradialytic Neuromuscular Electrical Stimulation on Strength and Muscle Architecture in Patients With Chronic Kidney Failure: Randomized Clinical Trial. *Artif Organs.* 2017;41(11):1049-58.
25. Schlosser K, Bartsch DK, Diener MK, Seiler CM, Bruckner T, Nies C, et al. Total Parathyroidectomy With Routine Thymectomy and Autotransplantation Versus Total Parathyroidectomy Alone for Secondary Hyperparathyroidism: Results of a Nonconfirmatory Multicenter Prospective Randomized Controlled Pilot Trial. *Ann Surg.* 2016;264(5):745-53.
26. Siriopol D, Onofriescu M, Voroneanu L, Apetrii M, Nistor I, Hogas S, et al. Dry weight assessment by combined ultrasound and bioimpedance monitoring in low cardiovascular risk hemodialysis patients: a randomized controlled trial. *Int Urol Nephrol.* 2017;49(1):143-53
27. Tayebi M, Tayebi A, Einollahi B, Ebadi A, Jafari A. Isometric Resistance Training and Branched-Chain Amino Acids Supplementation Can Improve Dialysis Adequacy: A Clinical Trial. *Nephro-Urol Mon.* 2019;11(2):e91175.

28. Thadhani R, Zella JB, Knutson DC, Blaser WJ, Plum LA, Clagett-Dame M, et al. 2MD (DP001), a Single Agent in the Management of Hemodialysis Patients: A Randomized Trial. *Am J Nephrol.* 2017;45(1):40-8.
29. Xavier VB, Roxo RS, Miorin LA, Dos Santos Alves VL, Dos Santos Sens YA. Impact of continuous positive airway pressure (CPAP) on the respiratory capacity of chronic kidney disease patients under hemodialysis treatment. *Int Urol Nephrol.* 2015;47(6):1011-6.
30. Ziaee SAR, Karvandi M, Ziaee NS, Ghozloujeh ZG, Shahrabaf M, Roshan A. Effects of spironolactone on cardiovascular complications in hemodialysis patients of taleghani hospital during the period of 2016-2017: A randomized double-blind controlled clinical trial. *Iranian Heart Journal.* 2019;20:45-52.
31. de Sequera Ortiz P, Pérez García R, Molina Nuñez M, Muñoz González RI, Álvarez Fernández G, Mérida Herrero E, et al. Prospective randomised multicentre study to demonstrate the benefits of haemodialysis without acetate (with citrate): ABC-treat Study. Acute effect of citrate. *Nefrologia.* 2019;39(4):424-33.
32. Eljaoudi R, Elkabbaj D, Bahadi A, Ibrahimi A, Benyahia M, Errasfa M. Consumption of Argan Oil Improves Anti-Oxidant and Lipid Status in Hemodialysis Patients. *Phytother Res.* 2015;29(10):1595-9.
33. Ettema EM, Kuipers J, van Faassen M, Groen H, van Roon AM, Lefrandt JD, et al. Effect of plasma sodium concentration on blood pressure regulators during hemodialysis: a randomized crossover study. *BMC Nephrol.* 2018;19(1):214.
34. Jeong JH, Biruete A, Fernhall B, Wilund KR. Effects of acute intradialytic exercise on cardiovascular responses in hemodialysis patients. *Hemodial Int.* 2018;22(4):524-33.
35. Leung KCW, Quinn RR, Ravani P, Duff H, MacRae JM. Randomized Crossover Trial of Blood Volume Monitoring-Guided Ultrafiltration Biofeedback to Reduce Intradialytic Hypotensive Episodes with Hemodialysis. *Clin J Am Soc Nephrol.* 2017;12(11):1831-40.
36. Orcy R, Antunes MF, Schiller T, Seus T, Böhlke M. Aerobic exercise increases phosphate removal during hemodialysis: a controlled trial. *Hemodial Int.* 2014;18(2):450-8.
37. Razeghi E, Dashti-Khavidaki S, Nassiri S, Abolghassemi R, Khalili H, Hashemi Nazari SS, et al. A randomized crossover clinical trial of sertraline for intradialytic hypotension. *Iran J Kidney Dis.* 2015;9(4):323-30.
38. Rivara MB, Mehrotra R, Linke L, Ruzinski J, Ikizler TA, Himmelfarb J. A pilot randomized crossover trial assessing the safety and short-term effects of pomegranate supplementation in hemodialysis patients. *J Ren Nutr.* 2015;25(1):40-9.
39. Shahgholian N, Salehi A, Mortazavi M. Impact of stepwise sodium and ultra filtration profiles and dialysis solution flow rate profile on dialysis adequacy. *Iran J Nurs Midwifery Res.* 2014;19(5):537-41.
40. Smith WB, Gibson S, Newman GE, Hendon KS, Askelson M, Zhao J, et al. The dynamics of the metabolism of acetate and bicarbonate associated with use of hemodialysates in the ABChD trial: a phase IV, prospective, single center, single blind, randomized, cross-over, two week investigation. *BMC Nephrol.* 2017;18(1):273.
41. Thompson S, Manns B, Lloyd A, Hemmelgarn B, MacRae J, Klarenbach S, et al. Impact of using two dialyzers in parallel on phosphate clearance in hemodialysis patients: a randomized trial. *Nephrology Dialysis Transplantation.* 2016;32(5):855-61.
42. Tsai WC, Wu HY, Peng YS, Hsu SP, Chiu YL, Yang JY, et al. Short-Term Effects of Very-Low-Phosphate and Low-Phosphate Diets on Fibroblast Growth Factor 23 in Hemodialysis Patients: A Randomized Crossover Trial. *Clin J Am Soc Nephrol.* 2019;14(10):1475-83.

43. Wu VC, Huang TM, Shiao CC, Lai CF, Tsai PR, Wang WJ, et al. The hemodynamic effects during sustained low-efficiency dialysis versus continuous veno-venous hemofiltration for uremic patients with brain hemorrhage: a crossover study. *J Neurosurg.* 2013;119(5):1288-95.
44. Bennett PN, Fraser S, Barnard R, Haines T, Ockerby C, Street M, et al. Effects of an intradialytic resistance training programme on physical function: a prospective stepped-wedge randomized controlled trial. *Nephrology Dialysis Transplantation.* 2015;31(8):1302-9.
45. Bennett PN, Miller MD, Woodman RJ, Hill K, Murray S, Gleadle JM. Nutrition screening by nurses in dialysis. *J Clin Nurs.* 2013;22(5-6):723-32.
46. Birdee GS, Rothman RL, Sohl SJ, Wertebaker D, Wheeler A, Bossart C, et al. Feasibility and Safety of Intradialysis Yoga and Education in Maintenance Hemodialysis Patients. *J Ren Nutr.* 2015;25(5):445-53.
47. Griva K, Nandakumar M, Ng J-aH, Lam KFY, McBain H, Newman SP. Hemodialysis Self-management Intervention Randomized Trial (HED-SMART): A Practical Low-Intensity Intervention to Improve Adherence and Clinical Markers in Patients Receiving Hemodialysis. *American Journal of Kidney Diseases.* 2018;71(3):371-81.
48. Griva K, Rajeswari M, Nandakumar M, Khoo EYH, Lee VYW, Chua CG, et al. The combined diabetes and renal control trial (C-DIRECT) - a feasibility randomised controlled trial to evaluate outcomes in multi-morbid patients with diabetes and on dialysis using a mixed methods approach. *BMC nephrology.* 2019;20(1):2-.
49. Huang B, Li Z, Wang Y, Xia J, Shi T, Jiang J, et al. Effectiveness of self-management support in maintenance haemodialysis patients with hypertension: A pilot cluster randomized controlled trial. *Nephrology (Carlton).* 2018;23(8):755-63.
50. Karavetian M, Ghaddar S. Nutritional education for the management of osteodystrophy (nemo) in patients on haemodialysis: a randomised controlled trial. *J Ren Care.* 2013;39(1):19-30.
51. Karavetian M, de Vries N, Elzein H, Rizk R, Bechwaty F. Effect of behavioral stage-based nutrition education on management of osteodystrophy among hemodialysis patients, Lebanon. *Patient Educ Couns.* 2015;98(9):1116-22.
52. Weisbord SD, Mor MK, Green JA, Sevick MA, Shields AM, Zhao X, et al. Comparison of symptom management strategies for pain, erectile dysfunction, and depression in patients receiving chronic hemodialysis: a cluster randomized effectiveness trial. *Clin J Am Soc Nephrol.* 2013;8(1):90-9.
53. Wileman V, Chilcot J, Armitage CJ, Farrington K, Wellsted DM, Norton S, et al. Evidence of improved fluid management in patients receiving haemodialysis following a self-affirmation theory-based intervention: A randomised controlled trial. *Psychol Health.* 2016;31(1):100-14.
54. Wileman V, Farrington K, Chilcot J, Norton S, Wellsted DM, Almond MK, et al. Evidence that self-affirmation improves phosphate control in hemodialysis patients: a pilot cluster randomized controlled trial. *Ann Behav Med.* 2014;48(2):275-81.
